# Supplementary material
Source: MDPI journal article supplement (https://www.mdpi.com/2073-4441/14/17/2723)
Supplement: s1 [file s1]

## Article

# Treatment of Wastewaters Containing Sulfonylurea Herbicides by Electroflotation: Chemical and Ecotoxicological Efficacy

Ramom R. Nunes <sup>1</sup>, Rui Ribeiro <sup>2</sup>, Gabriel M. Morão <sup>3</sup>, Maria O. O. Rezende <sup>3</sup> and Matilde Moreira-Santos <sup>2,\*</sup>

## Supplementary material

**Table S1.** Results of pH, conductivity (COND;  $\mu\text{S}/\text{cm}$ ) and dissolved oxygen (DO; % saturation) measured at the start (in the control and each prepared test solution;  $n = 1$ ) and at the end (in two replicates;  $n = 2$ ) of the 48 h lethal test with the cadoceran *Daphnia magna* conducted on the untreated (A0) and electroflotation-treated (A3) wastewater solutions (both diluted in a  $\times 2$  factor from 80 to 5.0%).

| Treatment         | A0 solution test |           |      | A3 solution test |           |      |
|-------------------|------------------|-----------|------|------------------|-----------|------|
| START ( $n = 1$ ) | pH               | COND      | DO   | pH               | COND      | DO   |
| control           | 7.65             | 561       | > 60 | 7.53             | 560       | > 60 |
| 5.0               | 7.70             | 492       | > 60 | 7.65             | 560       | > 60 |
| 10                | 7.73             | 560       | > 60 | 7.67             | 559       | > 60 |
| 20                | 7.80             | 459       | > 60 | 7.66             | 558       | > 60 |
| 40                | 7.78             | 353       | > 60 | 7.66             | 554       | > 60 |
| 80                | 7.44             | 138       | > 60 | 7.36             | 545       | > 60 |
| END ( $n = 2$ )   | pH               | COND      | DO   | pH               | COND      | DO   |
| control           | 8.04 / 7.83      | 568 / 565 | > 60 | 7.92 / 8.04      | 568 / 570 | > 60 |
| 5.0               | 8.04 / 8.02      | 540 / 541 | > 60 | 8.06 / 8.06      | 567 / 567 | > 60 |
| 10                | 8.01 / 7.99      | 514 / 503 | > 60 | 8.01 / 8.04      | 565 / 567 | > 60 |
| 20                | 7.94 / 7.92      | 466 / 464 | > 60 | 8.04 / 8.01      | 568 / 566 | > 60 |
| 40                | 7.81 / 7.81      | 366 / 362 | > 60 | 7.88 / 7.89      | 565 / 561 | > 60 |
| 80                | 7.33 / 7.41      | 142 / 138 | > 60 | 7.60 / 7.42      | 556 / 551 | > 60 |

**Table S2.** Results of the cell density (CD;  $\times 10^4$  cells  $\text{mL}^{-1}$ ) and specific growth rate per day (SGR;  $\text{d}^{-1}$ ) of the microalgae *Raphidocelis subcapitata* used as test organism to conduct 72 h growth tests on the untreated (A0) and electroflotation-treated (A3) wastewater solutions (both diluted in a  $\times 2$  factor from 100 to 3.13%). Both toxicity tests were conducted simultaneously using the same control treatment (MBL growth medium diluted 2.5 times) replicated six times ( $n = 6$ ) and each test solution was replicated three times ( $n = 3$ ).

| Treatment   | Measured response            |      |                                    |      |
|-------------|------------------------------|------|------------------------------------|------|
| Control     | CD                           |      | SGR                                |      |
| ( $n = 6$ ) | 139; 213; 145; 155; 130; 131 |      | 1.64; 1.79; 1.66; 1.68; 1.62; 1.63 |      |
|             | A0 test solutions (%)        |      | A3 test solutions (%)              |      |
| ( $n = 3$ ) | CD                           | SGR  | CD                                 | SGR  |
|             | 5.47                         | 0.57 | 7.81                               | 0.69 |
| 3.13        | 4.38                         | 0.49 | 2.66                               | 0.33 |
|             | 4.38                         | 0.49 | 3.13                               | 0.38 |
|             | 2.97                         | 0.36 | 6.88                               | 0.64 |
| 6.25        | 3.13                         | 0.38 | 1.72                               | 0.18 |
|             | 3.44                         | 0.41 | 2.66                               | 0.33 |
|             | 3.59                         | 0.43 | 3.75                               | 0.44 |
| 12.5        | 2.66                         | 0.33 | 3.59                               | 0.43 |
|             | 2.66                         | 0.33 | 1.72                               | 0.18 |

|      |      |       |      |      |
|------|------|-------|------|------|
| 25.0 | 2.50 | 0.31  | 1.83 | 0.20 |
|      | 2.03 | 0.24  | 1.83 | 0.20 |
|      | 2.03 | 0.24  | 2.03 | 0.24 |
| 50.0 | 2.66 | 0.33  | 3.75 | 0.44 |
|      | 2.34 | 0.28  | 3.59 | 0.43 |
|      | 1.56 | 0.15  | 2.34 | 0.28 |
| 100  | 1.09 | 0.030 | 2.50 | 0.31 |
|      | 1.09 | 0.030 | 1.88 | 0.21 |
|      | 1.25 | 0.074 | 1.88 | 0.21 |

**Table S3.** Results of the cumulative number of dead organisms of the cladoceran *Daphnia magna* used as test organism to conduct 48 h lethal tests on the untreated (A0) and electroflotation-treated (A3) wastewater solutions (both diluted in a  $\times 2$  factor from 80 to 5.0%). Both toxicity tests were conducted with the control and each test solution replicated four times ( $n = 4$ ).

| Treatment<br>( $n = 4$ ) | A0 solution test |       |       |       | A3 solution test |       |       |       |
|--------------------------|------------------|-------|-------|-------|------------------|-------|-------|-------|
|                          | rep 1            | rep 2 | rep 3 | rep 4 | rep 1            | rep 2 | rep 3 | rep 4 |
| control                  | 0                | 0     | 0     | 0     | 0                | 0     | 0     | 0     |
| 5.0                      | 0                | 0     | 0     | 0     | 0                | 0     | 0     | 0     |
| 10                       | 0                | 1     | 0     | 0     | 0                | 0     | 0     | 0     |
| 20                       | 4                | 4     | 1     | 3     | 4                | 4     | 3     | 4     |
| 40                       | 4                | 5     | 4     | 4     | 5                | 4     | 5     | 5     |
| 80                       | 5                | 5     | 4     | 5     | 5                | 5     | 5     | 5     |

**Table S4.** Results of the statistical analysis, by one-way analysis of variance (ANOVA), conducted to evaluate the effects of the of untreated (A0) and electroflotation-treated (A3) solutions (both diluted in a  $\times 2$  factor from 100 to 3.13%) on the growth rate responses of the microalgae *Raphidocelis subcapitata*. All tests were carried out with the software STATISTICA Version 7.0 (StatSoft, Inc., Tulsa, USA) with the level of significance set at 0.05.

| Assumptions for one-way ANOVA |                                  |                                                            |
|-------------------------------|----------------------------------|------------------------------------------------------------|
|                               | Normality                        | Homoscedasticity                                           |
|                               | Shapiro-Wilk's test <sup>a</sup> | Bartlett's test                                            |
| A0 solutions test             | W = 0.73, P < 0.05               | $\chi^2 = 4.63$ , P = 0.605, df = 6                        |
| A3 solutions test             | W = 0.72, P < 0.05               | $\chi^2 = 12.3$ , P = 0.055, df = 6                        |
|                               | One-way ANOVA                    | Dunnett's test                                             |
|                               |                                  |                                                            |
| A0 solutions test             | $F_{6,17} = 478$ , P < 0.0001    | all dilutions significantly lower than control: P < 0.0001 |
| A3 solutions test             | $F_{6,17} = 85$ , P < 0.0001     | all dilutions significantly lower than control: P < 0.0001 |
| One-way ANOVA                 |                                  |                                                            |
| A0 versus A3 – 3.13%          | $F_{1,4} = 0.215$ , P = 0.66     |                                                            |
| A0 versus A3 – 6.25%          | $F_{1,4} = 0.00166$ , P = 0.99   |                                                            |
| A0 versus A3 – 12.5%          | $F_{1,4} = 0.0122$ , P = 0.92    |                                                            |
| A0 versus A3 – 25%            | $F_{1,4} = 3.23$ , P = 0.15      |                                                            |
| A0 versus A3 – 50%            | $F_{1,4} = 3.20$ , P = 0.15      |                                                            |
| A0 versus A3 – 100%           | $F_{1,4} = 31.2$ , P < 0.01      |                                                            |

<sup>a</sup> the null hypothesis was rejected but one-way ANOVA was conducted on the original data because: (1) it is a fairly robust analysis against violations of normality assumption and (2) the null hypothesis to test homoscedasticity was accepted.
